# Supplementary material
Source: Springer Nature journal article supplement (https://www.springermedizin.de/resource/supplementary/12943_2010_792_MOESM6_ESM.pdf/9554840)

**A**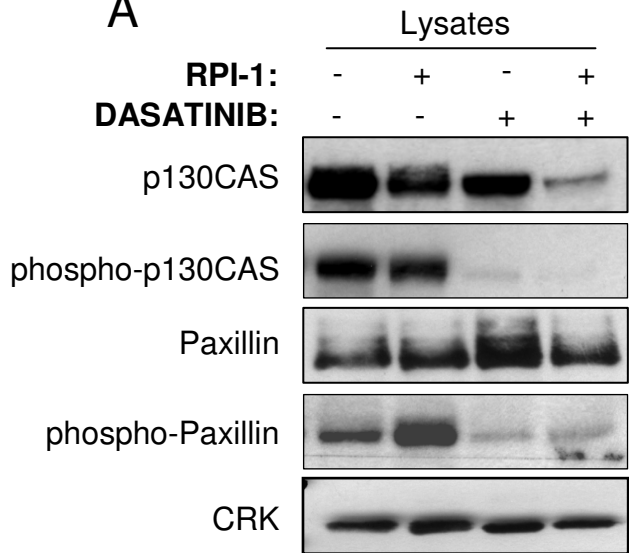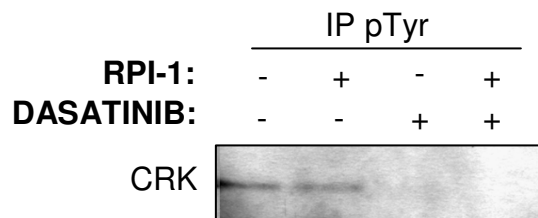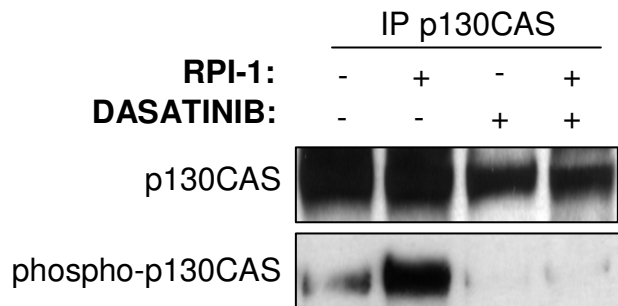**B**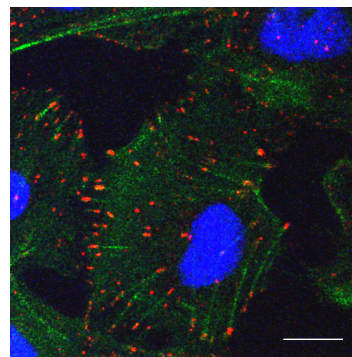

DMSO

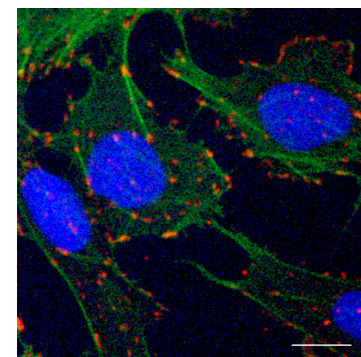

RPI-1

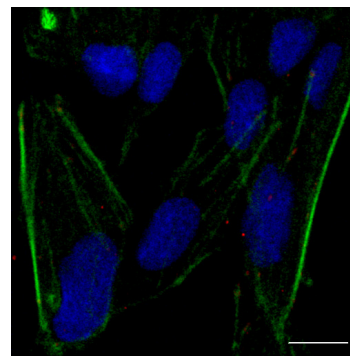

Dasatinib

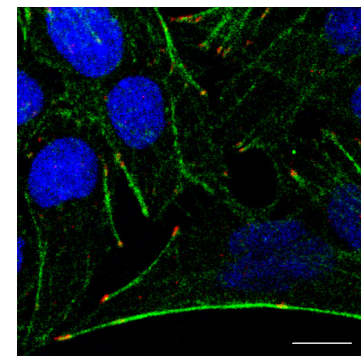RPI-1 +  
Dasatinib

Supplement: MOESM6 [file 9554840]
